# Supplementary material for: Controllable Deposition of Bi onto Pd for Selective Hydrogenation of Acetylene
Source: MDPI journal article supplement (doi:10.3390/molecules28052335), 2023-03-03
Supplement: s1 [file s1]

## Supporting Information

### Controllable deposition of Bi onto Pd for selective hydrogenation of acetylene

Hongquan Kang<sup>1,†</sup>, Baohui Lou<sup>1,†</sup>, Yue Wang<sup>1</sup>, Yilin Zhao<sup>1</sup>, Juanjuan Liu<sup>2</sup>, Jianzhou Wu<sup>1,\*</sup>, Shihui Zou<sup>1,\*</sup> and Jie Fan<sup>1,3\*</sup>

1. Key Lab of Applied Chemistry of Zhejiang Province, Department of Chemistry, Zhejiang University, 310027 Hangzhou, China.
2. College of Materials & Environmental Engineering, Hangzhou Dianzi University, Hangzhou 310036, China
3. Shanxi-Zheda Institute of Advanced Materials and Chemical Engineering, Taiyuan, 030032, China

\*Correspondences: jfan@zju.edu (J. Fan); xueshan199@163.com (S.-H. Zou); wjzclig@gmail.com (J.-Z. Wu)

†These authors contributed equally to this work.

**Table S1.** ICP-OES analysis of Pd NCs@Bi<sub>x</sub>.

| Samples                   | Nominal ratio of<br>Bi/Pd (mol%) <sup>a</sup> | Actual ratio of<br>Bi/Pd (mol%) <sup>b</sup> |
|---------------------------|-----------------------------------------------|----------------------------------------------|
| Pd NCs@Bi <sub>0.06</sub> | 0.06                                          | 0.06                                         |
| Pd NCs@Bi <sub>0.25</sub> | 0.25                                          | 0.26                                         |
| Pd NCs@Bi <sub>0.5</sub>  | 0.50                                          | 0.47                                         |
| Pd NCs@Bi <sub>1</sub>    | 1.00                                          | 1.02                                         |

<sup>a</sup> Determined by the concentration of PdNCs and Bi precursors added.

<sup>b</sup> Determined by ICP-OES analysis.

**Table S2.** ICP-OES analysis of catalysts.

| Catalysts                                                               | Loading amount of<br>Pd / wt% | Loading amount of<br>Bi/ wt% |
|-------------------------------------------------------------------------|-------------------------------|------------------------------|
| Pd NCs@Bi <sub>0.06</sub> /Al <sub>2</sub> O <sub>3</sub>               | 0.23                          | 0.03                         |
| Pd NCs@Bi <sub>0.25</sub> /Al <sub>2</sub> O <sub>3</sub>               | 0.19                          | 0.12                         |
| Pd NCs@Bi <sub>0.5</sub> /Al <sub>2</sub> O <sub>3</sub>                | 0.21                          | 0.21                         |
| Pd NCs@Bi <sub>1</sub> /Al <sub>2</sub> O <sub>3</sub>                  | 0.19                          | 0.42                         |
| Pd <sub>7nm</sub> NCs@Bi <sub>0.5</sub> /Al <sub>2</sub> O <sub>3</sub> | 0.18                          | 0.20                         |
| Pd <sub>7nm</sub> NCs@Bi <sub>1</sub> /Al <sub>2</sub> O <sub>3</sub>   | 0.22                          | 0.39                         |
| Pd <sub>7nm</sub> NCs@Bi <sub>1.3</sub> /Al <sub>2</sub> O <sub>3</sub> | 0.19                          | 0.50                         |
| Pd NPs@Bi <sub>1</sub> /Al <sub>2</sub> O <sub>3</sub>                  | 0.18                          | 0.38                         |
| Pd NPs@Bi <sub>0.8</sub> /CaCO <sub>3</sub>                             | 0.22                          | 0.29                         |

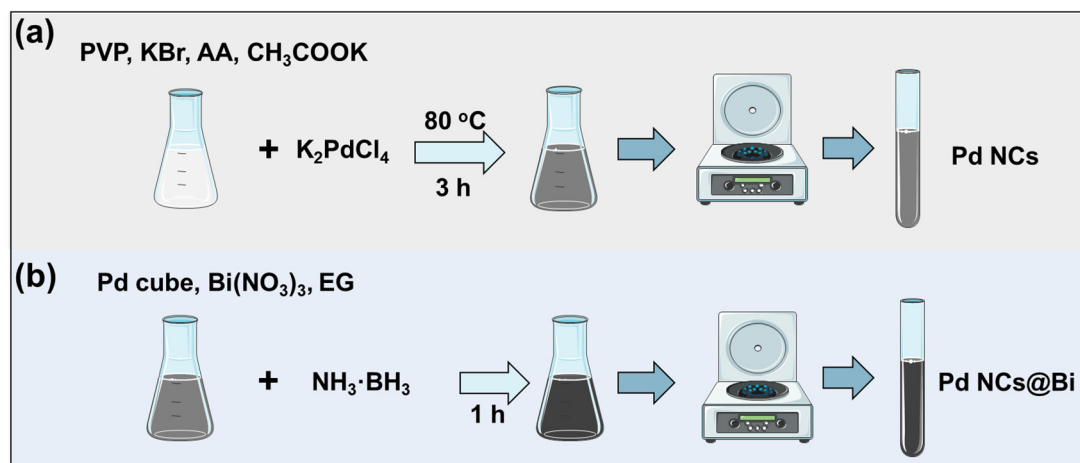

**Figure S1.** Schematic illustration of (a) Pd nanocubes (Pd NCs) and (b) site-specific deposition of Bi on Pd nanocubes (Pd NCs@Bi) synthesis.

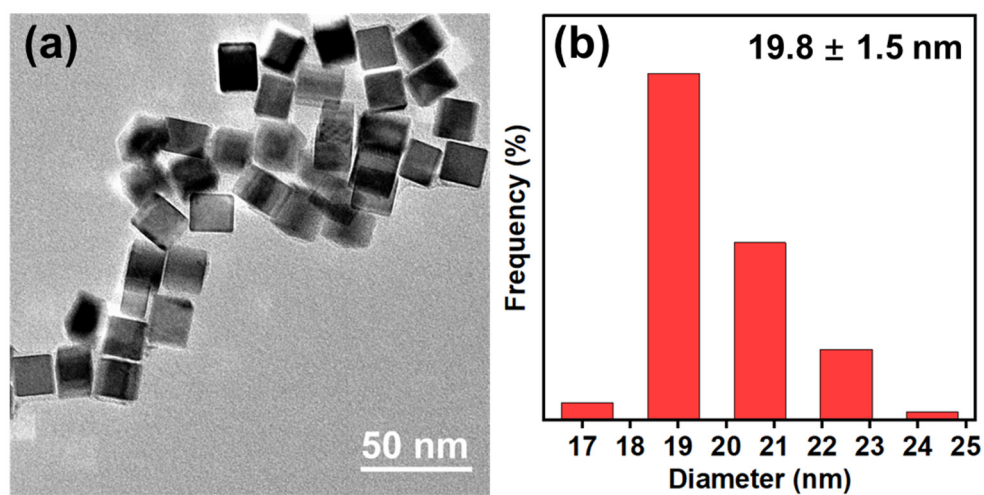

**Figure S2.** (a) HRTEM image and (b) size distribution of 20 nm sized Pd NCs.

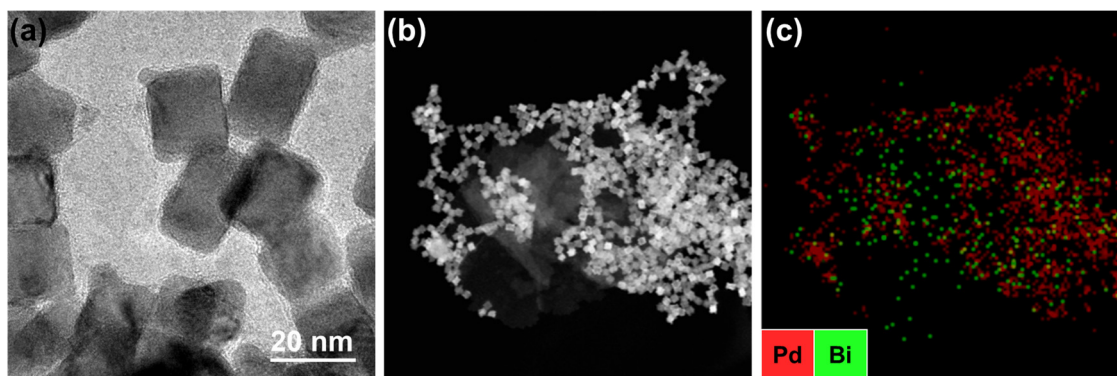

**Figure S3.** (a) HRTEM image and (b-c) EDS elemental maps of Pd NCs@Bi<sub>0.25</sub> using NaBH<sub>4</sub> as reductant.

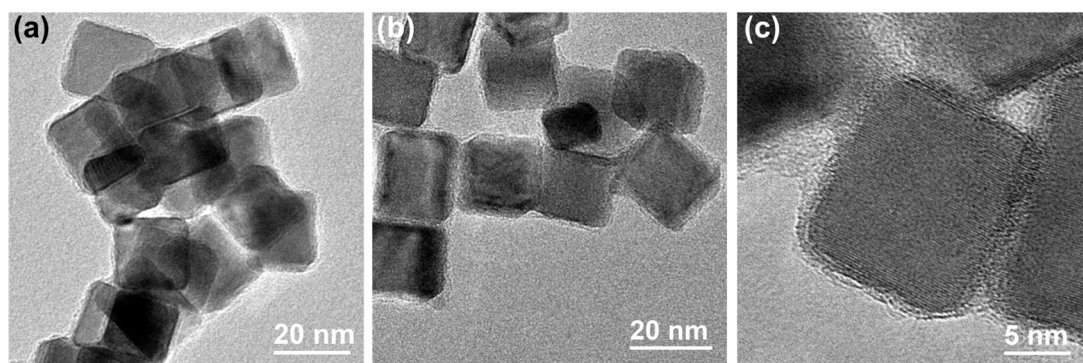

**Figure S4.** HRTEM images of Pd NCs@Bi<sub>0.25</sub> using NH<sub>3</sub>·BH<sub>3</sub>-NaOH as reductant.

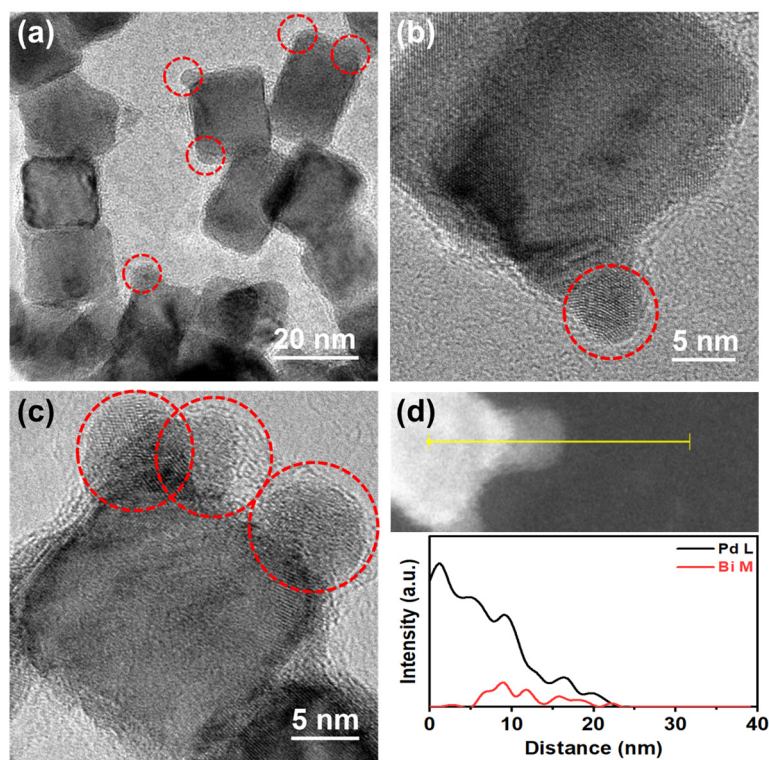

**Figure S5.** (a-c) HRTEM images and (d) line scanning profile of Pd NCs@Bi<sub>0.06</sub>.



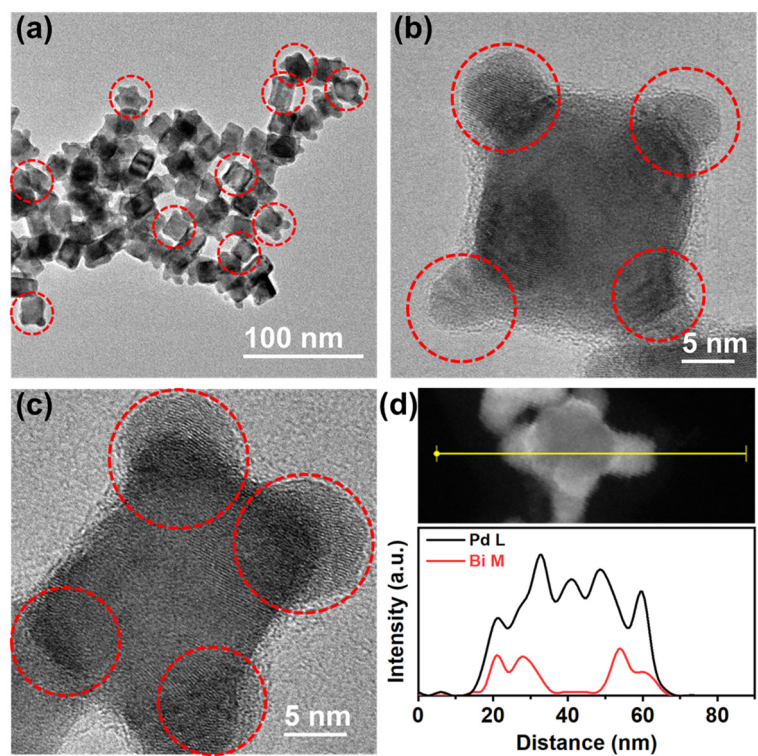

**Figure S6.** (a-c) HRTEM images and (d) line scanning profile of Pd NCs@Bi<sub>0.25</sub>.

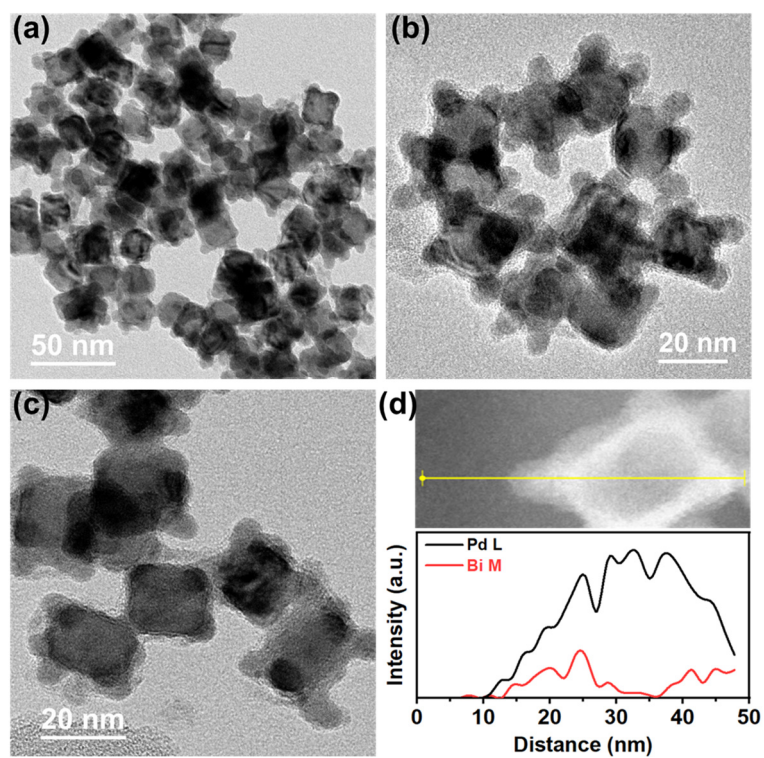

**Figure S7.** (a-c) HRTEM images and (d) line scanning profile of Pd NCs@Bi<sub>0.5</sub>.

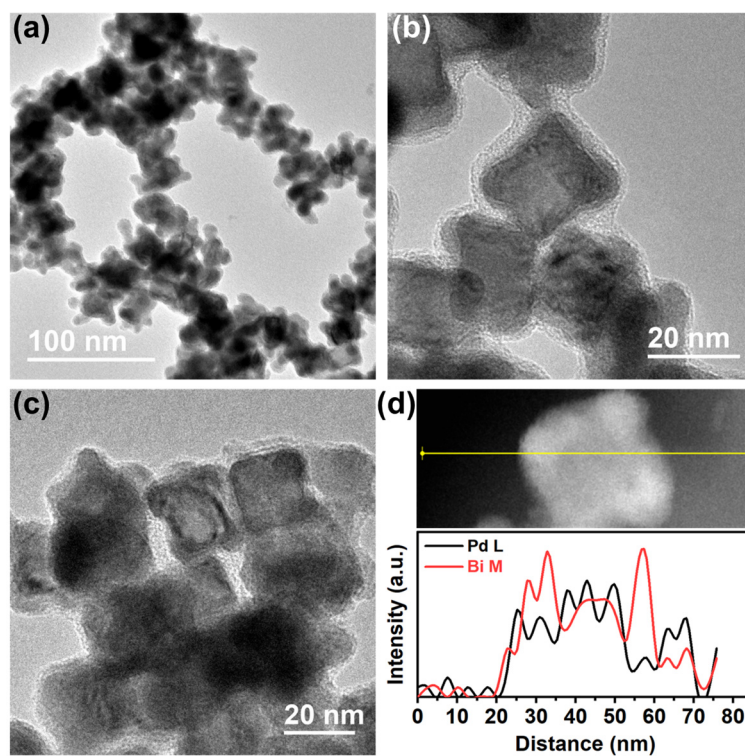

**Figure S8.** (a-c) HRTEM images and (d) line scanning profile of Pd NCs@Bi<sub>1</sub>.

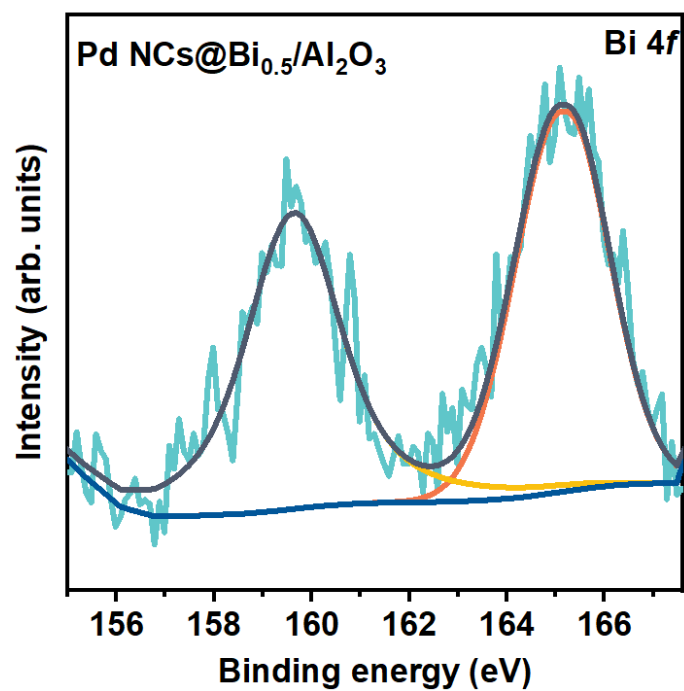

**Figure S9.** Bi 4f XPS spectra of Pd NCs@Bi<sub>0.5</sub>/Al<sub>2</sub>O<sub>3</sub> catalyst. Notably, Pd 3d signal was undetectable due to the low Pd content (0.2 wt.%) and the fact that Bi coating on the surface of the Pd NCs could affect the signal of Pd.

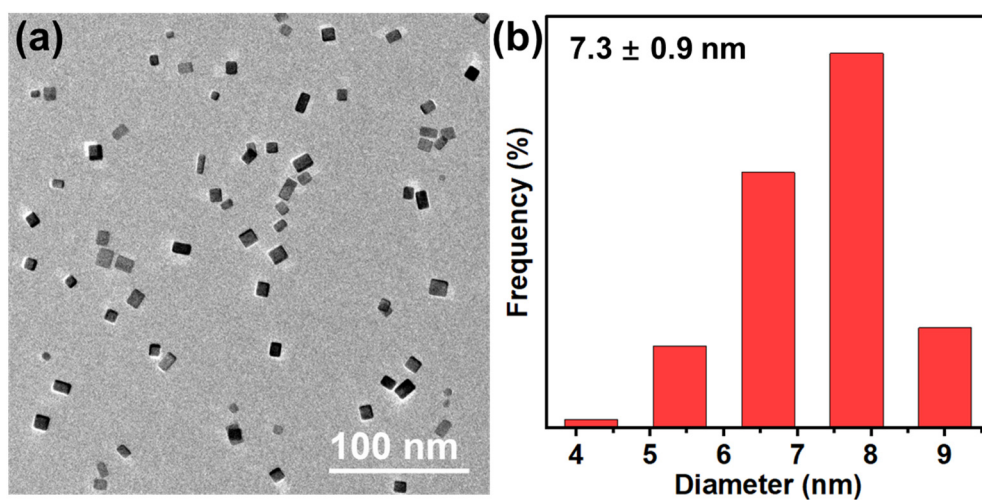

**Figure S10.** (a) HRTEM image and (b) size distribution of 7 nm sized Pd NCs.

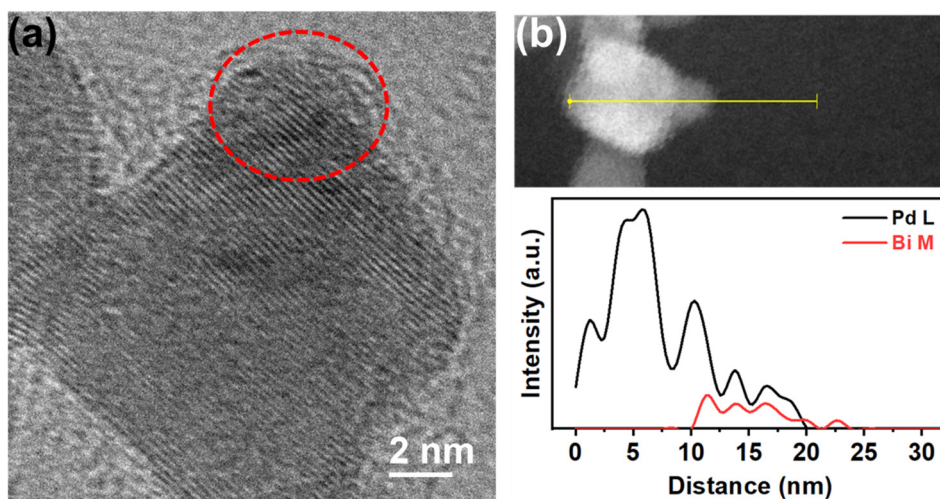

**Figure S11.** (a) HRTEM images and (b) line scanning profile of Pd<sub>7nm</sub> NCs@Bi<sub>0.5</sub>.

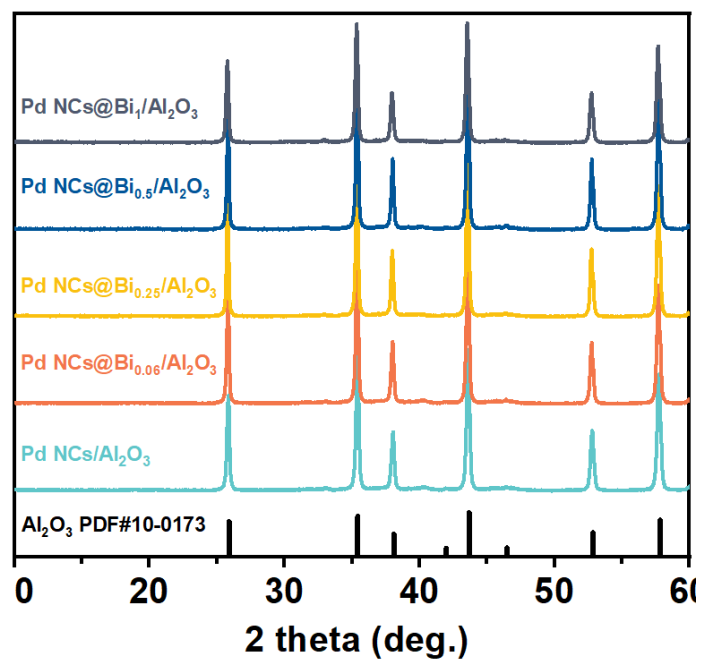

**Figure S12.** XRD patterns of Pd NCs/Al<sub>2</sub>O<sub>3</sub>, Pd NCs@Bi<sub>0.06</sub>/Al<sub>2</sub>O<sub>3</sub>, Pd NCs@Bi<sub>0.25</sub>/Al<sub>2</sub>O<sub>3</sub>, Pd NCs@Bi<sub>0.5</sub>/Al<sub>2</sub>O<sub>3</sub> and Pd NCs@Bi<sub>1</sub>/Al<sub>2</sub>O<sub>3</sub> catalysts.

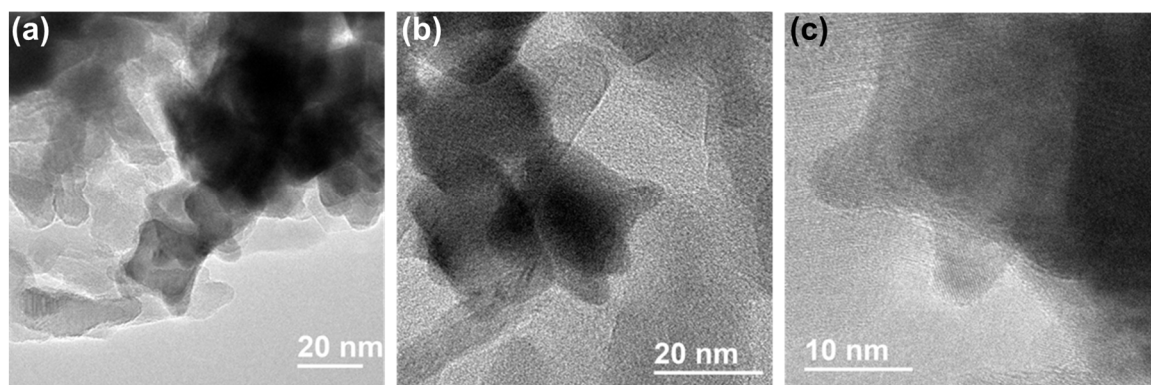

**Figure S13.** HRTEM images of Pd NCs@Bi<sub>0.5</sub>/Al<sub>2</sub>O<sub>3</sub>-spent catalyst.



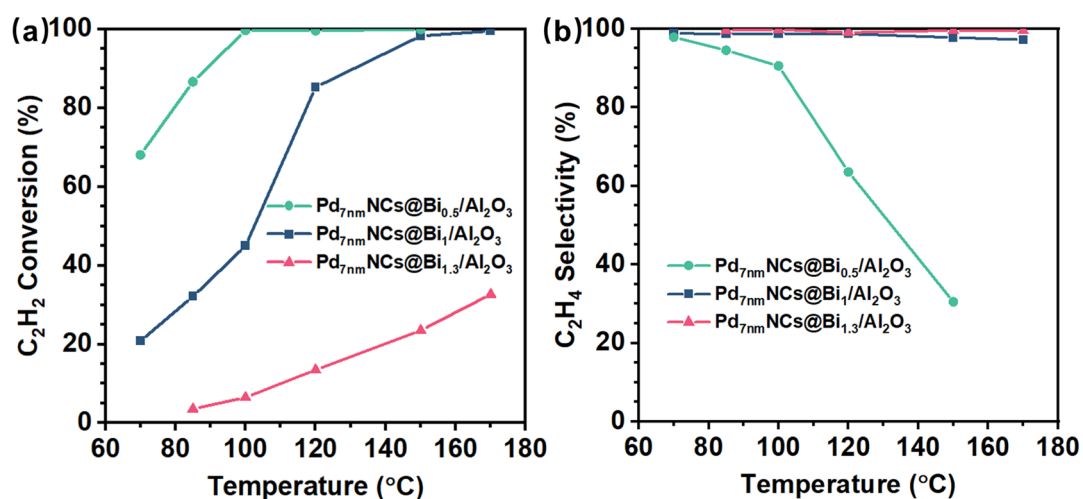

**Figure S14** Catalytic performances of  $\text{Pd}_{7\text{nm}}\text{NCs}@Bi_x/Al_2O_3$  catalysts in acetylene hydrogenation. (a)  $C_2H_2$  conversion as a function of reaction temperature and (b)  $C_2H_4$  selectivity as a function of reaction temperature. (Reaction conditions: space velocity of  $120000\text{ mL h}^{-1}\text{ g}^{-1}$  and reactant gases: 1.0 vol %  $C_2H_2$ , 20.0 vol %  $C_2H_4$ , 20.0 vol %  $H_2$ , and 59 vol %  $N_2$ ).

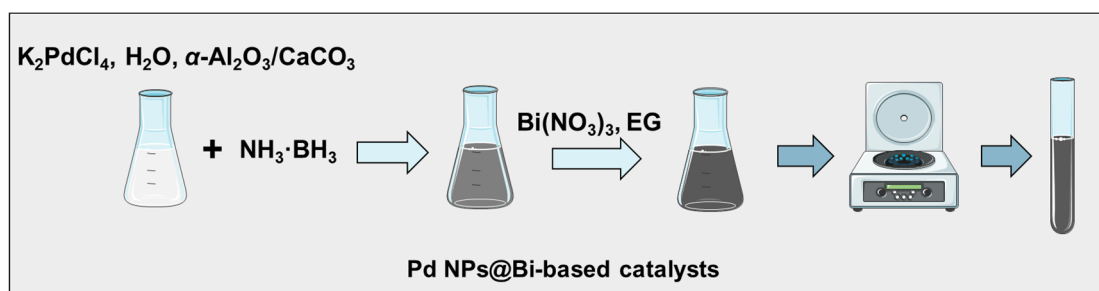

**Figure S15.** Schematic illustration of Pd NPs@Bi-based catalysts synthesis.

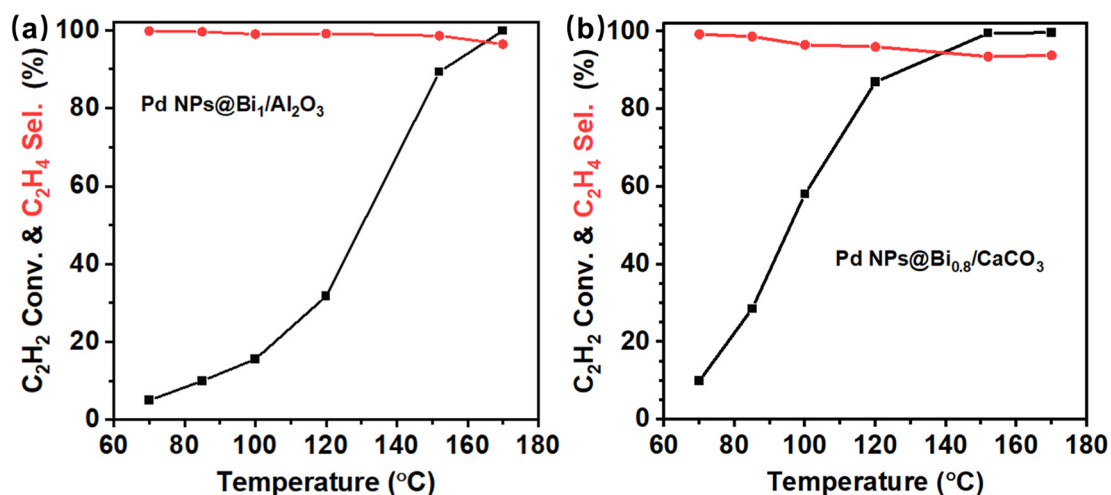

**Figure S16** Catalytic performances of Pd NPs@Bi based catalysts in acetylene hydrogenation. (a) C<sub>2</sub>H<sub>2</sub> conversion and C<sub>2</sub>H<sub>4</sub> selectivity as a function of reaction temperature over Pd NP@Bi<sub>1</sub>/Al<sub>2</sub>O<sub>3</sub> and (b) C<sub>2</sub>H<sub>2</sub> conversion and C<sub>2</sub>H<sub>4</sub> selectivity as a function of reaction temperature over Pd NP@Bi<sub>0.8</sub>/CaCO<sub>3</sub>. (Reaction conditions: space velocity of 120000 mL h<sup>-1</sup> g<sup>-1</sup> and reactant gases: 1.0 vol % C<sub>2</sub>H<sub>2</sub>, 20.0 vol % C<sub>2</sub>H<sub>4</sub>, 20.0 vol % H<sub>2</sub>, and 59 vol % N<sub>2</sub>).
